# Supplementary material for: The effect of terminal dimethyl and diethyl substituents on the J-aggregate-like molecular arrangement of bisazomethine dye molecules
Source: Royal Society of Chemistry journal article supplement (doi:10.1039/c5ce00845j), 2015-01-01
Supplement: c5ce00845j1.pdf [file c5ce00845j1.pdf]

Supporting Information for:

**The effect of terminal dimethyl and diethyl substituents on the J-aggregate-like molecular arrangement of bisazomethine dye molecules**

Takumi Jindo<sup>a</sup>, Byung-Soon Kim<sup>a</sup>, Naho Sasaki<sup>a</sup>, Yohei Shinohara<sup>a</sup>, Young-A Son<sup>b</sup>, Sung-Hoon Kim<sup>c,d</sup> and Shinya Matsumoto<sup>a,\*</sup>

<sup>a</sup>*Graduate School of Environmental and Information Sciences, Yokohama National University, 79-7, Tokiwadai, Hodogaya-ku, Yokohama 240-8501, Japan.*

<sup>b</sup>*School of Chemical and Biological Engineering, Chungnam National University, Daejeon 305-764, Korea.*

<sup>c</sup>*Department of Textile System Engineering, Kyungpook National University, Daegu 702-701, Korea.*

<sup>d</sup>*School of Chemical Science & Technology, Zhanjiang National University, Zhanjiang 524048, PR China.*

---

\*Corresponding author. Tel.: +81-45-339-3366; Fax: +81-45-339-3345. *E-mail address:* smatsu@ynu.ac.jp (Shinya Matsumoto).

Figures S1–S3                      .....                      S2

Tables S1–S3                      .....                      S3

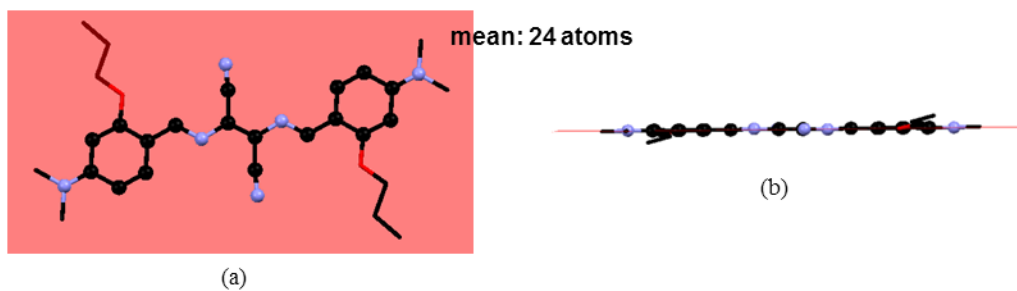

**Figure S1** The molecular  $\pi$ -plane drawn by Mercury 3.1: (a) on the top view and (b) on the side view.

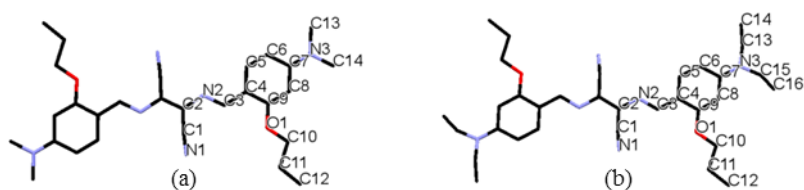

**Figure S2** Atomic labels depicted by Mercury 3.1: (a) of 1c and (b) of 2c.

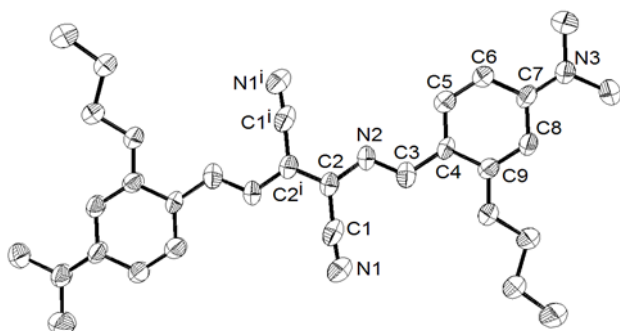

**Figure S3** Atomic labels depicted by ORTEP-3 of the component atoms of the  $\pi$ -conjugated system.

**Table S1** Deviation of the atoms from the molecular  $\pi$ -plane in the crystalline states of **1a–1f** and **2c–2f**.

|                                                                                                                 | <b>1a</b> | <b>1b</b> | <b>1c</b> | <b>1d</b> | <b>1e</b> | <b>1f</b> | <b>2c</b> | <b>2d</b> | <b>2e</b> | <b>2f</b> |
|-----------------------------------------------------------------------------------------------------------------|-----------|-----------|-----------|-----------|-----------|-----------|-----------|-----------|-----------|-----------|
| Deviation of the component atoms of the $\pi$ -conjugationsystem from the $\pi$ -plane/ Å                       |           |           |           |           |           |           |           |           |           |           |
| N1                                                                                                              | 0.029     | 0.064     | 0.002     | 0.008     | 0.017     | 0.011     | 0.016     | 0.015     | 0.019     | 0.026     |
| C1                                                                                                              | 0.015     | 0.019     | 0.011     | 0.013     | 0.023     | 0.005     | 0.024     | 0.023     | 0.018     | 0.029     |
| C2                                                                                                              | 0.019     | 0.001     | 0.010     | 0.009     | 0.004     | 0.010     | 0.049     | 0.038     | 0.045     | 0.005     |
| N2                                                                                                              | 0.009     | 0.031     | 0.032     | 0.012     | 0.025     | 0.002     | 0.120     | 0.092     | 0.111     | 0.048     |
| C3                                                                                                              | 0.061     | 0.024     | 0.014     | 0.033     | 0.010     | 0.048     | 0.143     | 0.127     | 0.149     | 0.018     |
| C4                                                                                                              | 0.021     | 0.003     | 0.009     | 0.003     | 0.018     | 0.036     | 0.113     | 0.110     | 0.132     | 0.048     |
| C5                                                                                                              | 0.101     | 0.037     | 0.002     | 0.005     | 0.016     | 0.055     | 0.178     | 0.162     | 0.197     | 0.032     |
| C6                                                                                                              | 0.066     | 0.033     | 0.002     | 0.021     | 0.032     | 0.043     | 0.122     | 0.098     | 0.120     | 0.004     |
| C7                                                                                                              | 0.024     | 0.000     | 0.014     | 0.003     | 0.004     | 0.014     | 0.055     | 0.058     | 0.066     | 0.027     |
| C8                                                                                                              | 0.059     | 0.045     | 0.009     | 0.006     | 0.021     | 0.015     | 0.093     | 0.091     | 0.089     | 0.002     |
| C9                                                                                                              | 0.008     | 0.046     | 0.017     | 0.007     | 0.013     | 0.013     | 0.021     | 0.022     | 0.033     | 0.047     |
| N3                                                                                                              | 0.065     | 0.024     | 0.012     | 0.021     | 0.000     | 0.082     | 0.215     | 0.175     | 0.236     | 0.070     |
| Deviation of the component atoms of the alkoxy substituents from the $\pi$ -plane/ Å                            |           |           |           |           |           |           |           |           |           |           |
| O1                                                                                                              | 0.003     | O1 0.102  | O1 0.018  | O1 0.021  | O1 0.007  | O1 0.010  | O1 0.040  | O1 0.056  | O1 0.055  | O1 0.109  |
| C10                                                                                                             | 0.470     | C10 0.318 | C10 0.242 | C10 0.098 | C10 0.299 | C10 0.075 | C10 0.110 | C10 0.140 | C10 0.159 | C10 0.081 |
| C11                                                                                                             | 1.757     |           | C11 0.315 | C11 0.011 | C11 0.548 | C11 0.125 | C11 0.288 | C11 0.372 | C11 0.325 | C11 0.213 |
| C12                                                                                                             | 2.171     |           | C12 0.631 | C12 1.099 | C12 1.700 | C12 0.045 | C12 0.298 | C12 0.404 | C12 0.468 | C12 0.894 |
| C13                                                                                                             | 1.348     |           |           | C13 0.903 | C13 1.969 | C13 0.044 |           | C13 0.681 | C13 0.698 | C13 0.810 |
| C14                                                                                                             | 0.078     |           |           |           | C14 3.088 | C14 0.091 |           |           | C14 0.999 | C14 1.859 |
| C15                                                                                                             | 0.399     |           |           |           |           | C15 0.105 |           |           |           | C15 1.789 |
|                                                                                                                 |           |           |           |           |           | C16 0.245 |           |           |           | C16 2.823 |
|                                                                                                                 |           |           |           |           |           | C17 0.238 |           |           |           | C17 2.738 |
|                                                                                                                 |           |           |           |           |           | C18 0.355 |           |           |           | C18 3.696 |
|                                                                                                                 |           |           |           |           |           | C19 0.337 |           |           |           | C19 3.609 |
| Deviation of the carbon atoms of the dialkyl substituents on the terminal amino groups from the $\pi$ -plane/ Å |           |           |           |           |           |           |           |           |           |           |
| C16                                                                                                             | 0.04      | C11 0.06  | C13 0.01  | C14 0.01  | C15 0.06  | C20 0.11  | C13 0.13  | C14 0.18  | C15 0.11  | C20 0.06  |
| C17                                                                                                             | 0.04      | C12 0.01  | C14 0.03  | C15 0.02  | C16 0.14  | C21 0.01  | C14 1.01  | C15 0.90  | C16 1.02  | C21 1.25  |
|                                                                                                                 |           |           |           |           |           |           | C15 0.76  | C16 0.81  | C17 0.73  | C22 0.36  |
|                                                                                                                 |           |           |           |           |           |           | C16 0.33  | C17 0.30  | C18 0.36  | C23 0.90  |

**Table S2** Intramolecular bond angles and bond distances on the  $\pi$ -conjugated system in the crystalline states of **1a–1f** and **2c–2f**.

|                              | <b>1a</b>   | <b>1b</b>  | <b>1c</b>   | <b>1d</b>  | <b>1e</b>   | <b>1f</b>   | Mean deviation<br>in <b>1a - 1f</b> | <b>2c</b>  | <b>2d</b>  | <b>2e</b>   | <b>2f</b>   | Mean deviation<br>in <b>1a - 2f</b> |
|------------------------------|-------------|------------|-------------|------------|-------------|-------------|-------------------------------------|------------|------------|-------------|-------------|-------------------------------------|
| Bond angles/°                |             |            |             |            |             |             |                                     |            |            |             |             |                                     |
| $\angle$ N3C7C6              | 121.70 (8)  | 121.10 (3) | 122.70 (9)  | 121.70 (4) | 121.32 (18) | 121.55 (13) | 0.36                                | 122.70 (5) | 121.60 (5) | 121.19 (18) | 121.36 (15) | 0.41                                |
| $\angle$ N3C7C8              | 119.50 (9)  | 120.90 (3) | 120.50 (7)  | 121.10 (4) | 121.14 (18) | 120.34 (13) | 0.47                                | 120.70 (5) | 121.00 (5) | 121.16 (18) | 120.71 (17) | 0.36                                |
| $\angle$ C6C7C8              | 118.80 (8)  | 118.00 (3) | 116.70 (9)  | 117.20 (3) | 117.50 (2)  | 118.10 (13) | 0.58                                | 116.60 (5) | 117.40 (5) | 117.64 (18) | 117.92 (19) | 0.51                                |
| $\angle$ C5C6C7              | 120.20 (8)  | 120.00 (3) | 121.90 (9)  | 121.40 (4) | 120.67 (17) | 120.07 (14) | 0.63                                | 121.20 (5) | 120.90 (5) | 120.10 (19) | 119.97 (15) | 0.57                                |
| $\angle$ C4C5C6              | 122.60 (7)  | 123.10 (3) | 122.00 (8)  | 122.20 (4) | 122.68 (17) | 122.58 (14) | 0.28                                | 122.20 (5) | 123.30 (6) | 122.81 (19) | 123.17 (17) | 0.35                                |
| $\angle$ C5C4C9              | 115.70 (7)  | 116.40 (3) | 116.50 (9)  | 116.90 (3) | 116.50 (2)  | 117.17 (13) | 0.34                                | 117.30 (5) | 116.30 (5) | 117.00 (17) | 116.52 (18) | 0.37                                |
| $\angle$ C4C9C8              | 122.60 (8)  | 121.70 (3) | 122.50 (8)  | 121.90 (4) | 121.44 (16) | 121.15 (13) | 0.45                                | 120.60 (5) | 120.30 (5) | 120.78 (17) | 121.28 (14) | 0.60                                |
| $\angle$ C7C8C9              | 120.00 (8)  | 120.80 (3) | 120.30 (8)  | 120.40 (4) | 121.09 (17) | 120.89 (13) | 0.35                                | 121.90 (5) | 121.60 (5) | 121.47 (18) | 121.12 (17) | 0.48                                |
| $\angle$ C3C4C5              | 121.50 (7)  | 122.10 (2) | 122.70 (7)  | 122.10 (3) | 122.57 (17) | 121.99 (13) | 0.32                                | 122.30 (5) | 122.90 (5) | 122.41 (17) | 122.06 (16) | 0.31                                |
| $\angle$ C3C4C9              | 122.60 (8)  | 121.50 (3) | 120.70 (9)  | 121.00 (4) | 120.82 (16) | 120.84 (13) | 0.54                                | 120.30 (5) | 120.70 (5) | 120.59 (17) | 121.39 (14) | 0.47                                |
| $\angle$ N2C3C4              | 121.60 (7)  | 121.80 (3) | 123.10 (8)  | 122.10 (4) | 122.55 (17) | 121.65 (14) | 0.46                                | 121.20 (5) | 121.70 (5) | 122.36 (18) | 121.86 (14) | 0.43                                |
| $\angle$ C2N2C3              | 119.70 (7)  | 120.30 (3) | 121.80 (7)  | 120.00 (4) | 119.36 (16) | 119.80 (13) | 0.59                                | 119.80 (5) | 120.00 (5) | 119.77 (17) | 119.78 (13) | 0.41                                |
| $\angle$ N2C2C2 <sup>i</sup> | 118.40 (10) | 121.20 (3) | 122.10 (12) | 120.20 (4) | 120.87 (16) | 120.68 (17) | 0.85                                | 120.00 (5) | 119.50 (5) | 120.62 (18) | 120.58 (13) | 0.71                                |
| $\angle$ N2C2C1              | 122.20 (6)  | 121.50 (2) | 120.70 (6)  | 122.00 (3) | 121.11 (16) | 121.72 (13) | 0.44                                | 122.50 (5) | 121.30 (5) | 120.77 (17) | 121.45 (16) | 0.46                                |
| $\angle$ C1C2C2 <sup>i</sup> | 119.40 (10) | 117.30 (3) | 117.00 (12) | 117.80 (3) | 118.02 (19) | 117.59 (16) | 0.57                                | 117.50 (6) | 119.20 (5) | 118.57 (18) | 117.94 (17) | 0.61                                |
| Bond distances/Å             |             |            |             |            |             |             |                                     |            |            |             |             |                                     |
| N3—C7                        | 1.366 (7)   | 1.365 (4)  | 1.336 (9)   | 1.361 (5)  | 1.358 (4)   | 1.364 (19)  | 0.008                               | 1.365 (8)  | 1.351 (8)  | 1.371 (2)   | 1.365 (3)   | 0.007                               |
| C6—C7                        | 1.400 (8)   | 1.415 (4)  | 1.412 (9)   | 1.407 (5)  | 1.416 (3)   | 1.420 (2)   | 0.005                               | 1.408 (7)  | 1.396 (8)  | 1.409 (3)   | 1.413 (2)   | 0.006                               |
| C5—C6                        | 1.360 (7)   | 1.366 (5)  | 1.354 (9)   | 1.366 (5)  | 1.362 (4)   | 1.373 (2)   | 0.005                               | 1.369 (8)  | 1.353 (9)  | 1.367 (3)   | 1.371 (3)   | 0.005                               |
| C4—C5                        | 1.404 (7)   | 1.402 (4)  | 1.400 (9)   | 1.399 (6)  | 1.405 (3)   | 1.406 (2)   | 0.002                               | 1.385 (7)  | 1.388 (9)  | 1.395 (2)   | 1.398 (2)   | 0.005                               |
| C4—C9                        | 1.416 (8)   | 1.412 (3)  | 1.406 (9)   | 1.406 (5)  | 1.411 (3)   | 1.415 (2)   | 0.003                               | 1.409 (7)  | 1.425 (8)  | 1.406 (2)   | 1.416 (2)   | 0.005                               |
| C8—C9                        | 1.354 (8)   | 1.379 (5)  | 1.367 (9)   | 1.382 (5)  | 1.381 (4)   | 1.385 (2)   | 0.009                               | 1.378 (8)  | 1.377 (8)  | 1.377 (2)   | 1.379 (2)   | 0.006                               |
| C7—C8                        | 1.404 (8)   | 1.406 (4)  | 1.419 (9)   | 1.422 (6)  | 1.405 (3)   | 1.412 (2)   | 0.006                               | 1.403 (7)  | 1.402 (8)  | 1.403 (2)   | 1.408 (2)   | 0.006                               |
| C3—C4                        | 1.429 (8)   | 1.423 (5)  | 1.433 (9)   | 1.425 (5)  | 1.429 (4)   | 1.438 (2)   | 0.004                               | 1.423 (8)  | 1.439 (8)  | 1.433 (2)   | 1.432 (2)   | 0.005                               |
| N2—C3                        | 1.307 (7)   | 1.294 (3)  | 1.296 (8)   | 1.294 (5)  | 1.295 (3)   | 1.295 (2)   | 0.003                               | 1.313 (7)  | 1.302 (7)  | 1.297 (2)   | 1.298 (2)   | 0.005                               |
| N2—C2                        | 1.376 (8)   | 1.376 (4)  | 1.366 (9)   | 1.378 (4)  | 1.377 (3)   | 1.381 (19)  | 0.003                               | 1.381 (8)  | 1.384 (7)  | 1.383 (2)   | 1.378 (2)   | 0.003                               |
| C1—C2                        | 1.435 (9)   | 1.446 (5)  | 1.462 (12)  | 1.440 (6)  | 1.448 (3)   | 1.449 (2)   | 0.006                               | 1.445 (10) | 1.445 (10) | 1.448 (3)   | 1.443 (2)   | 0.005                               |
| N1—C1                        | 1.129 (7)   | 1.133 (5)  | 1.144 (10)  | 1.131 (7)  | 1.133 (3)   | 1.148 (2)   | 0.006                               | 1.144 (9)  | 1.131 (10) | 1.139 (3)   | 1.140 (2)   | 0.006                               |
| C2—C2 <sup>i</sup>           | 1.377 (12)  | 1.375 (3)  | 1.340 (13)  | 1.380 (5)  | 1.369 (3)   | 1.371 (3)   | 0.010                               | 1.379 (8)  | 1.353 (8)  | 1.363 (2)   | 1.372 (2)   | 0.010                               |

**Table S3** Results of the lattice energy calculations in **1c–1f** and **2c–2f** focusing on the 3<sup>rd</sup>–4<sup>th</sup> and 5<sup>th</sup>–6<sup>th</sup>.

|                       | Contribution of molecular pairs to the total lattice energies |                                                                                      |                          |                                                                                      |                         |                                                                                        |
|-----------------------|---------------------------------------------------------------|--------------------------------------------------------------------------------------|--------------------------|--------------------------------------------------------------------------------------|-------------------------|----------------------------------------------------------------------------------------|
|                       | Total lattice energy/ kJ mol <sup>-1</sup>                    | 3 <sup>rd</sup> and 4 <sup>th</sup> contributions/ kJ mol <sup>-1</sup> (ratio, ADC) |                          | 5 <sup>th</sup> and 6 <sup>th</sup> contributions/ kJ mol <sup>-1</sup> (ratio, ADC) |                         | Energy gap between 3rd - 4th and 5th - 6th contributions/ kJ mol <sup>-1</sup> (ratio) |
| <b>1c</b>             | -508.0                                                        | -47.2                                                                                | (9.3%, 45601 and 65401)  | -40.3                                                                                | (7.9%, 44501 and 66501) | -6.9 (1.4%)                                                                            |
| <b>1d</b>             | -528.2                                                        | -50.2                                                                                | (9.5%, 44501 and 66501)  | -32.6                                                                                | (6.2%, 34401 and 76601) | -17.6 (3.3%)                                                                           |
| <b>1e</b>             | -537.3                                                        | -49.5                                                                                | (9.2%, 45401 and 65601)  | -41.6                                                                                | (7.7%, 46501 and 64501) | -7.9 (1.5%)                                                                            |
| <b>1f</b>             | -706.9                                                        | -64.7                                                                                | (9.2%, 54501 and 56501)  | -50.4                                                                                | (7.1%, 46401 and 64601) | -14.3 (2.0%)                                                                           |
| <b>2c<sup>a</sup></b> | -574.4                                                        | -86.5                                                                                | (15.1%, 44501 and 66501) | -15.0                                                                                | (2.6%, 43501 and 67501) | -71.5 (12.4%)                                                                          |
| <b>2d</b>             | -592.9                                                        | -85.9                                                                                | (14.5%, 45401 and 65601) | -17.6                                                                                | (3.0%, 35401 and 75601) | -68.3 (11.5%)                                                                          |
| <b>2e<sup>a</sup></b> | -596.4                                                        | -88.6                                                                                | (14.9%, 45601 and 65401) | -21.4                                                                                | (3.6%, 45701 and 65301) | -67.2 (11.3%)                                                                          |
| <b>2f<sup>a</sup></b> | -724.1                                                        | -62.6                                                                                | (8.6%, 46401 and 64601)  | -37.6                                                                                | (5.2%, 44501 and 66501) | -25 (3.5%)                                                                             |

<sup>a</sup> The results of the lattice energy calculations of **2c**, **2e** and **2f** have been reported previously.<sup>30</sup>
